# Supplementary material for: Outcomes Assessment of Sustainable and Innovatively Simple Lifestyle Modification at the Workplace-Drinking Electrolyzed-Reduced Water (OASIS-ERW): A Randomized, Double-Blind, Placebo-Controlled Trial
Source: PubMed Central journal article supplement (PMC7402115; doi:10.3390/antiox9070564), 2020-06-27
Supplement: antioxidants-09-00564-s001.pdf [file antioxidants-09-00564-s001.pdf]

**Supplementary Materials (Table S1- Table S5)**

Table S1: Baseline Characteristics of the Study Participants

Table S2: Effect of Treatment on the Primary Outcome Variables: Biomarkers of Oxidative Stress

Table S3: Effects of Treatment on the Secondary Outcome Variables: Biochemistry Parameters

Table S4: Effects of Treatment on the Secondary Outcome Variables: CAVI, HRV, PhA, and Fat Mass

Table S5: Effects of Treatment on the Secondary Outcome Variables: BEPSI-K, BFI, FSS, and SF-36

Table S1: Baseline Characteristics of the Study Participants

| Characteristic     |                   | ERW<br>(n=29)  | MW<br>(n=24)   | P value             |
|--------------------|-------------------|----------------|----------------|---------------------|
| <b>Demographic</b> |                   |                |                |                     |
|                    | years             |                |                |                     |
| Age                |                   | 39.3±8.9       | 41.0±9.3       | 0.523*              |
| Sex                | no. (%)           |                |                | 1.000 <sup>†</sup>  |
| Female             |                   | 25 (86.2%)     | 21(87.5%)      |                     |
| Male               |                   | 4 (13.8%)      | 3 (12.5%)      |                     |
| Marital status     | no. (%)           |                |                | 0.378 <sup>‡</sup>  |
| Married            |                   | 18 (62.1%)     | 12 (50.0%)     |                     |
| Single             |                   | 11 (37.9%)     | 12 (50.0%)     |                     |
| Educational level  | no. (%)           |                |                | 0.701 <sup>§</sup>  |
| High school        |                   | 3 (10.3%)      | 2 (8.3%)       |                     |
| College/University |                   | 21 (72.4%)     | 17 (70.8%)     |                     |
| Postgraduate       |                   | 5 (17.2%)      | 5 (20.8%)      |                     |
| Occupation         | no. (%)           |                |                | 0.886 <sup>§</sup>  |
| Professionals      |                   | 6 (20.7%)      | 5 (20.8%)      |                     |
| White collar       |                   | 20 (69.0%)     | 17 (70.8%)     |                     |
| Blue collar        |                   | 3 (10.3%)      | 2 (8.3%)       |                     |
| <b>Clinical</b>    |                   |                |                |                     |
| d-ROMs             | U.CARR            | 301.3 ± 68.6   | 347.3 ± 94.9   | 0.046*              |
| BAP                | µmol/L            | 2027.4 ± 226.9 | 2015.7 ± 274.8 | 0.734 <sup>  </sup> |
| TBARS (MDA)        | µM                | 9.88 ± 4.67    | 8.90 ± 5.98    | 0.506*              |
| 8-OHdG             | ng/mL             | 14.33 ± 6.88   | 10.90 ± 6.42   | 0.069*              |
| oxLDL              | U/L               | 52.43 ± 17.38  | 49.38 ± 13.61  | 0.520 <sup>  </sup> |
| GPx                | nmol/min/mL       | 151.4 ± 31.1   | 140.1 ± 34.9   | 0.180 <sup>  </sup> |
| Body Mass Index    | kg/m <sup>2</sup> | 22.2 ± 3.0     | 23.0 ± 3.1     | 0.357*              |
| Blood pressure     | mmHg              |                |                |                     |
| Systolic           |                   | 116.3 ± 10.6   | 116.3 ± 9.5    | 0.943 <sup>†</sup>  |
| Diastolic          |                   | 72.0 ± 11.6    | 72.4 ± 9.5     | 0.971 <sup>  </sup> |
| Glucose            | mg/dL             | 92.8 ± 7.5     | 92.3 ± 6.9     | 0.805*              |
| AST                | IU/L              | 20.0 ± 6.0     | 23.4 ± 17.4    | 0.872 <sup>  </sup> |
| ALT                | IU/L              | 23.8 ± 46.3    | 22.1 ± 28.7    | 0.566 <sup>  </sup> |
| LDL-C              | mg/dL             | 119.3 ± 30.9   | 111.8 ± 26.1   | 0.350*              |
| TG                 | mg/dL             | 93.5 ± 59.4    | 104.5 ± 160.1  | 0.879 <sup>  </sup> |

Note: Continuous variables are given as means ± standard deviations (SD) and compared by \*T test or <sup>||</sup>Mann-Whitney U Test. Categorical variables are given as numbers (no) with percentages (%) and compared by <sup>‡</sup>Pearson's Chi-Squared Test, <sup>†</sup>Fisher's Exact Test, or <sup>§</sup>Linear-by-Linear Association as appropriate. Abbreviations: ERW, Electrolyzed Reduced Water; MW, Mineral Water; d-ROMs, diacron-Reactive Oxygen Metabolites; BAP, Biological Antioxidant Potential; TBARS, Thiobarbituric Acid Reactive Substances; MDA, Malondialdehyde; 8-OHdG, 8-Hydroxy-2-Deoxyguanosine; oxLDL, Oxidized Low Density Lipoprotein; GPx, glutathione peroxidase; AST, Aspartate aminotransferase ; ALT, Alanine aminotransferase; LDL-C, Low-Density Lipoprotein Cholesterol; TG, Triglyceride.

Table S2: Effect of Treatment on the Primary Outcome Variables: Biomarkers of Oxidative Stress

| Outcome Variables | ERW<br>(n=29)<br>Means±SD | MW<br>(n=24)<br>Means±SD | Main Effects of<br>Repeated Measures ANOVA |        |            |          |          |
|-------------------|---------------------------|--------------------------|--------------------------------------------|--------|------------|----------|----------|
|                   |                           |                          | Effect                                     | F      | df         | <i>p</i> | $\eta^2$ |
| d-ROMs            | U.CARR                    |                          |                                            |        |            |          |          |
| Baseline          | 301.3±68.6                | 347.3±94.9               | Time                                       | 6.61   | 1,68,85.65 | 0.004    | 0.115    |
| 4 wks             | 286.7±45.1                | 306.3±54.8               | Group                                      | 8.04   | 1,51       | 0.007    | 0.136    |
| 8 wks             | 288.0±50.0                | 349.6±62.7               | Time*Group                                 | 3.44   | 1,68,85.65 | 0.044    | 0.063    |
| BAP               | umol/L                    |                          |                                            |        |            |          |          |
| Baseline          | 2027.4±226.9              | 2015.7±274.8             | Time                                       | 258.47 | 2,102      | 0.000    | 0.835    |
| 4 wks             | 2585.9±258.8              | 2504.8±187.8             | Group                                      | 0.03   | 1,51       | 0.875    | 0.000    |
| 8 wks             | 2603.9±255.9              | 2670.4±180.2             | Time*Group                                 | 3.20   | 2,102      | 0.045    | 0.059    |
| TBARS (MDA)       | μM                        |                          |                                            |        |            |          |          |
| Baseline          | 9.88±4.67                 | 8.90±5.98                | Time                                       | 6.23   | 2,102      | 0.003    | 0.109    |
| 4 wks             | 6.84±3.99                 | 8.95±6.14                | Group                                      | 0.06   | 1,51       | 0.809    | 0.001    |
| 8 wks             | 6.97±4.51                 | 6.63±4.47                | Time*Group                                 | 2.45   | 2,102      | 0.091    | 0.046    |
| 8-OHdG            | ng/mL                     |                          |                                            |        |            |          |          |
| Baseline          | 14.33±6.88                | 10.90±6.42               | Time                                       | 3.52   | 2,102      | 0.033    | 0.065    |
| 4 wks             | 13.87±8.31                | 15.63±11.18              | Group                                      | 0.29   | 1,51       | 0.594    | 0.006    |
| 8 wks             | 11.87±7.90                | 10.87±7.00               | Time*Group                                 | 2.02   | 2,102      | 0.138    | 0.038    |
| oxLDL             | U/L                       |                          |                                            |        |            |          |          |
| Baseline          | 52.43±17.38               | 49.38±13.61              | Time                                       | 1.11   | 2,102      | 0.332    | 0.021    |
| 4 wks             | 53.60±15.32               | 52.00±12.94              | Group                                      | 0.17   | 1,51       | 0.679    | 0.003    |
| 8 wks             | 52.24±15.97               | 52.1±12.99               | Time*Group                                 | 0.63   | 2,102      | 0.534    | 0.012    |
| GPx               | nmol/min/mL               |                          |                                            |        |            |          |          |
| Baseline          | 151.4±31.1                | 140.1±34.9               | Time                                       | 27.07  | 2,102      | 0.000    | 0.347    |
| 4 wks             | 162.8±36.5                | 161.7±37.9               | Group                                      | 0.22   | 1,51       | 0.639    | 0.004    |
| 8 wks             | 185.8±30.9                | 189.6±23.6               | Time*Group                                 | 0.89   | 2,102      | 0.412    | 0.017    |

Note: \*Interaction between Time and the Group. Abbreviations: ANOVA, Analysis of Variance; F, the F-value; df, degrees of freedom; *p*, statistical significance;  $\eta^2$ , partial eta squared; d-ROMs, diacron-Reactive Oxygen Metabolites; BAP, Biological Antioxidant Potential; TBARS, Thiobarbituric Acid Reactive Substances; MDA, Malondialdehyde; 8-OHdG, 8-Hydroxy-2-Deoxyguanosine; oxLDL, Oxidized Low-Density Lipoprotein; GPx, Glutathione Peroxidase.

Table S3: Effects of Treatment on the Secondary Outcome Variables: Biochemistry Parameters

| Outcome Variables | ERW<br>(n=29)       | MW<br>(n=24)        | Main Effects of Repeated Measures ANOVA |       |            |          |          |
|-------------------|---------------------|---------------------|-----------------------------------------|-------|------------|----------|----------|
|                   | Means $\pm$ SD      | Means $\pm$ SD      | Effect                                  | F     | df         | <i>p</i> | $\eta^2$ |
| NK Cell Activity  | pg/mL               |                     |                                         |       |            |          |          |
| Baseline          | 949.0 $\pm$ 810.7   | 1263.4 $\pm$ 905.2  | Time                                    | 20.93 | 2,102      | 0.000    | 0.291    |
| 4wks              | 1943.5 $\pm$ 1109.2 | 1829.0 $\pm$ 1136.7 | Group                                   | 0.40  | 1,51       | 0.528    | 0.008    |
| 8wks              | 1814.2 $\pm$ 1091.8 | 2042.0 $\pm$ 964.9  | Time*Group                              | 1.26  | 2,102      | 0.289    | 0.024    |
| A.G.E.            | AU                  |                     |                                         |       |            |          |          |
| Baseline          | 2.05 $\pm$ 0.26     | 2.04 $\pm$ 0.27     | Time                                    | 20.94 | 2,102      | 0.000    | 0.291    |
| 4wks              | 1.83 $\pm$ 0.32     | 1.82 $\pm$ 0.23     | Group                                   | 0.09  | 1,51       | 0.767    | 0.002    |
| 8wks              | 1.82 $\pm$ 0.34     | 1.91 $\pm$ 0.33     | Time*Group                              | 1.42  | 2,102      | 0.246    | 0.027    |
| Glucose           | mg/dL               |                     |                                         |       |            |          |          |
| Baseline          | 92.8 $\pm$ 7.5      | 92.3 $\pm$ 6.9      | Time                                    | 0.02  | 2,102      | 0.978    | 0.000    |
| 4wks              | 92.8 $\pm$ 8.2      | 92.1 $\pm$ 6.0      | Group                                   | 0.22  | 1,51       | 0.640    | 0.004    |
| 8wks              | 93.0 $\pm$ 5.9      | 91.8 $\pm$ 6.2      | Time*Group                              | 0.09  | 2,102      | 0.916    | 0.002    |
| HbA1c             | mg/dL               |                     |                                         |       |            |          |          |
| Baseline          | 5.23 $\pm$ 0.29     | 5.32 $\pm$ 0.30     | Time                                    | 15.47 | 1,47,74.85 | 0.000    | 0.233    |
| 4wks              | 5.33 $\pm$ 0.29     | 5.43 $\pm$ 0.24     | Group                                   | 1.49  | 1,51       | 0.228    | 0.028    |
| 8wks              | 5.27 $\pm$ 0.27     | 5.36 $\pm$ 0.25     | Time*Group                              | 0.01  | 1,47,74.85 | 0.971    | 0.000    |
| Insulin           | uU/mL               |                     |                                         |       |            |          |          |
| Baseline          | 8.65 $\pm$ 3.78     | 8.21 $\pm$ 10.31    | Time                                    | 2.57  | 1,71,87.32 | 0.091    | 0.048    |
| 4wks              | 6.66 $\pm$ 3.19     | 7.18 $\pm$ 4.76     | Group                                   | 0.12  | 1,51       | 0.729    | 0.002    |
| 8wks              | 7.15 $\pm$ 3.19     | 8.50 $\pm$ 6.78     | Time*Group                              | 0.89  | 1,71,87.32 | 0.401    | 0.017    |
| HOMA-IR           |                     |                     |                                         |       |            |          |          |
| Baseline          | 2.21 $\pm$ 0.93     | 1.95 $\pm$ 2.74     | Time                                    | 2.35  | 1,61,81.94 | 0.112    | 0.044    |
| 4wks              | 1.55 $\pm$ 0.80     | 1.65 $\pm$ 1.15     | Group                                   | 0.11  | 1,51       | 0.739    | 0.002    |
| 8wks              | 1.68 $\pm$ 0.80     | 1.98 $\pm$ 1.61     | Time*Group                              | 0.49  | 1,61,81.94 | 0.575    | 0.009    |
| Cortisol          | ng/mL               |                     |                                         |       |            |          |          |
| Baseline          | 80.81 $\pm$ 35.53   | 81.78 $\pm$ 25.30   | Time                                    | 0.30  | 2,102      | 0.743    | 0.006    |
| 4wks              | 76.95 $\pm$ 27.36   | 79.06 $\pm$ 41.63   | Group                                   | 0.60  | 1,51       | 0.443    | 0.012    |
| 8wks              | 72.63 $\pm$ 27.47   | 85.70 $\pm$ 26.27   | Time*Group                              | 1.19  | 2,102      | 0.308    | 0.023    |
| TG                | mg/dL               |                     |                                         |       |            |          |          |
| Baseline          | 88.7 $\pm$ 59.4     | 113.4 $\pm$ 175.1   | Time                                    | 0.72  | 1,28,65.05 | 0.432    | 0.014    |
| 4wks              | 88.5 $\pm$ 64.8     | 94.5 $\pm$ 66.1     | Group                                   | 0.33  | 1,51       | 0.570    | 0.006    |
| 8wks              | 85.6 $\pm$ 61.6     | 90.3 $\pm$ 57.8     | Time*Group                              | 0.49  | 1,28,65.05 | 0.530    | 0.010    |
| LDL-C             | mg/dL               |                     |                                         |       |            |          |          |
| Baseline          | 119.3 $\pm$ 30.9    | 111.8 $\pm$ 26.1    | Time                                    | 2.71  | 2,102      | 0.071    | 0.051    |
| 4wks              | 120.4 $\pm$ 31.8    | 117.6 $\pm$ 28.8    | Group                                   | 0.24  | 1,51       | 0.628    | 0.005    |
| 8wks              | 114.6 $\pm$ 29.5    | 113.7 $\pm$ 26.1    | Time*Group                              | 1.26  | 2,102      | 0.288    | 0.024    |

|             |            |             |            |      |            |       |       |
|-------------|------------|-------------|------------|------|------------|-------|-------|
| HDL -C      | mg/dL      |             |            |      |            |       |       |
| Baseline    | 65.8±15.8  | 68.8±14.0   | Time       | 0.16 | 2,102      | 0.855 | 0.003 |
| 4wks        | 66.1±15.8  | 69.6±16.0   | Group      | 0.93 | 1,51       | 0.339 | 0.018 |
| 8wks        | 65.2±17.2  | 70.6±15.5   | Time*Group | 0.53 | 2,102      | 0.592 | 0.010 |
| Lactic Acid | mmol/L     |             |            |      |            |       |       |
| Baseline    | 1.76± 0.86 | 1.52±0.55   | Time       | 0.80 | 2,102      | 0.454 | 0.015 |
| 4wks        | 1.65± 0.65 | 1.58±0.61   | Group      | 0.15 | 1,51       | 0.699 | 0.003 |
| 8wks        | 1.44± 0.45 | 1.61±0.47   | Time*Group | 2.43 | 2,102      | 0.093 | 0.045 |
| Uric Acid   | mg/dL      |             |            |      |            |       |       |
| Baseline    | 4.29±1.43  | 4.53±1.09   | Time       | 2.63 | 2,102      | 0.077 | 0.049 |
| 4wks        | 4.26±1.33  | 4.37±1.20   | Group      | 0.12 | 1,51       | 0.732 | 0.002 |
| 8wks        | 4.49±1.36  | 4.48±0.93   | Time*Group | 1.49 | 2,102      | 0.231 | 0.028 |
| TB          | mg/dL      |             |            |      |            |       |       |
| Baseline    | 0.72±0.38  | 0.77±0.26   | Time       | 0.35 | 2,102      | 0.709 | 0.007 |
| 4wks        | 0.66±0.31  | 0.87±0.49   | Group      | 1.47 | 1,51       | 0.231 | 0.028 |
| 8wks        | 0.70±0.36  | 0.76±0.36   | Time*Group | 2.01 | 2,102      | 0.140 | 0.038 |
| GGT         | IU/L       |             |            |      |            |       |       |
| Baseline    | 25.8±27.0  | 22.9±19.8   | Time       | 0.82 | 1.36,69.49 | 0.403 | 0.016 |
| 4wks        | 24.0±20.4  | 31.3±44.9   | Group      | 0.18 | 1,51       | 0.672 | 0.004 |
| 8wks        | 21.9±14.5  | 25.6±24.8   | Time*Group | 1.25 | 1.36,69.49 | 0.281 | 0.024 |
| AST         | IU/L       |             |            |      |            |       |       |
| Baseline    | 20.0±6.0   | 23.4±17.4   | Time       | 1.75 | 1.69,86.07 | 0.180 | 0.033 |
| 4wks        | 19.1±6.1   | 25.3±23.9   | Group      | 1.72 | 1,51       | 0.196 | 0.033 |
| 8wks        | 18.5±4.9   | 19.6±6.4    | Time*Group | 1.00 | 1.69,86.07 | 0.359 | 0.019 |
| ALT         | IU/L       |             |            |      |            |       |       |
| Baseline    | 23.8±46.3  | 22.1±28.7   | Time       | 1.00 | 1.17,59.47 | 0.335 | 0.019 |
| 4wks        | 16.3±8.5   | 54.4±170.6  | Group      | 0.31 | 1,51       | 0.020 | 1.041 |
| 8wks        | 16.3±7.8   | 20.2±26.1   | Time*Group | 1.48 | 1.17,59.47 | 0.232 | 0.028 |
| ALP         | IU/L       |             |            |      |            |       |       |
| Baseline    | 161.4±41.5 | 165.3±43.0  | Time       | 2.76 | 2,102      | 0.068 | 0.051 |
| 4wks        | 159.9±43.5 | 170.3±56.4  | Group      | 0.54 | 1,51       | 0.468 | 0.010 |
| 8wks        | 152.2±38.3 | 163.7±44.0  | Time*Group | 0.85 | 2,102      | 0.432 | 0.016 |
| Serum Ca    | mg/dL      |             |            |      |            |       |       |
| Baseline    | 9.00±0.28  | 9.05±0.27   | Time       | 2.87 | 2,102      | 0.062 | 0.053 |
| 4wks        | 9.08±0.29  | 9.19±0.31   | Group      | 2.04 | 1,51       | 0.159 | 0.039 |
| 8wks        | 9.05±0.34  | 9.19±0.45   | Time*Group | 0.35 | 2,102      | 0.707 | 0.007 |
| Urine Ca    | mg/dL      |             |            |      |            |       |       |
| Baseline    | 13.08±5.73 | 11.07±7.72  | Time       | 0.57 | 2,102      | 0.567 | 0.011 |
| 4wks        | 9.84±5.76  | 13.20±11.79 | Group      | 0.04 | 1,51       | 0.848 | 0.001 |
| 8wks        | 10.94±8.13 | 10.69±10.84 | Time*Group | 2.69 | 2,102      | 0.073 | 0.050 |
| NLR         |            |             |            |      |            |       |       |
| Baseline    | 1.90 ±0.81 | 1.95±0.56   | Time       | 2.19 | 2,102      | 0.117 | 0.041 |

|          |           |           |            |      |            |       |       |
|----------|-----------|-----------|------------|------|------------|-------|-------|
| 4wks     | 1.71±0.54 | 1.86±0.47 | Group      | 0.34 | 1,51       | 0.561 | 0.007 |
| 8wks     | 1.92±0.84 | 1.98±0.51 | Time*Group | 0.23 | 2,102      | 0.799 | 0.004 |
| CRP      | mg/dL     |           |            |      |            |       |       |
| Baseline | 0.07±0.13 | 0.06±0.06 | Time       | 0.02 | 1,51,77.01 | 0.952 | 0.000 |
| 4wks     | 0.08±0.20 | 0.05±0.06 | Group      | 0.24 | 1,51       | 0.628 | 0.005 |
| 8wks     | 0.05±0.04 | 0.07±0.06 | Time*Group | 1.15 | 1,51,77.01 | 0.309 | 0.022 |

Note: \*Interaction between Time and the Group. Abbreviations: NK, Natural Killer; A.G.E., Advanced Glycation End Products; HbA1c, Glycosylated Hemoglobin; HOMA-IR, Homeostatic Model Assessment for Insulin Resistance; AU, Arbitrary Units; TG, Triglyceride; LDL-C, Low-Density Lipoprotein Cholesterol; HDL-C, High-Density Lipoprotein Cholesterol; TB, Total Bilirubin; IU, International Unit; GGT, Gamma-Glutamyltransferase; AST, Aspartate Aminotransferase ; ALT, Alanine Aminotransferase; ALP, Alkaline Phosphatase; NLR, Neutrophil-Lymphocyte Ratio; CRP, C-Reactive Protein.

Table S4: Effects of Treatment on the Secondary Outcome Variables: CAVI, HRV, PhA, and Fat Mass

| Outcome Variables | ERW Group (n=29)<br>Means±SD | MW Group (n=24)<br>Means±SD | Effect     | Main Effects of Repeated Measures ANOVA |                |       |                |
|-------------------|------------------------------|-----------------------------|------------|-----------------------------------------|----------------|-------|----------------|
|                   |                              |                             |            | F                                       | df             | p     | η <sup>2</sup> |
| CAVI-Rt           |                              |                             |            |                                         |                |       |                |
| Baseline          | 6.44±0.80                    | 6.36±1.06                   | Time       | 0.36                                    | 1,45,<br>73.80 | 0.627 | 0.007          |
| 4wks              | 6.32±0.80                    | 6.36±0.73                   | Group      | 0.11                                    | 1,51           | 0.738 | 0.002          |
| 8wks              | 6.18±0.69                    | 6.36±0.86                   | Time*Group | 0.38                                    | 1,45,<br>73.80 | 0.615 | 0.007          |
| CAVI-Lt           |                              |                             |            |                                         |                |       |                |
| Baseline          | 6.52±0.77                    | 6.48±1.11                   | Time       | 0.73                                    | 1,44,<br>73.30 | 0.444 | 0.014          |
| 4wks              | 6.38±0.83                    | 6.48±0.76                   | Group      | 0.32                                    | 1,51           | 0.577 | 0.006          |
| 8wks              | 6.23±0.69                    | 6.42±0.81                   | Time*Group | 0.29                                    | 1,44,<br>73.30 | 0.677 | 0.006          |
| HRV-SDNN          | ms                           |                             |            |                                         |                |       |                |
| Baseline          | 35.95±17.33                  | 30.42±20.05                 | Time       | 0.93                                    | 2,102          | 0.399 | 0.018          |
| 4wks              | 34.05±15.26                  | 35.33±13.47                 | Group      | 0.29                                    | 1,51           | 0.590 | 0.006          |
| 8wks              | 36.99±17.06                  | 37.82±11.28                 | Time*Group | 0.17                                    | 2,102          | 0.845 | 0.003          |
| HRV-RMSSD         | ms                           |                             |            |                                         |                |       |                |
| Baseline          | 27.49±13.44                  | 27.96±14.20                 | Time       | 0.06                                    | 2,102          | 0.939 | 0.001          |
| 4wks              | 26.74±14.40                  | 29.65±18.59                 | Group      | 0.49                                    | 1,51           | 0.487 | 0.010          |
| 8wks              | 26.03±12.03                  | 28.72±13.04                 | Time*Group | 0.17                                    | 2,102          | 0.845 | 0.003          |
| HRV-PSI           |                              |                             |            |                                         |                |       |                |
| Baseline          | 71.92±81.46                  | 52.85±31.23                 | Time       | 0.16                                    | 1,77,<br>90.31 | 0.825 | 0.003          |
| 4wks              | 71.54±59.39                  | 54.99±33.62                 | Group      | 1.83                                    | 1,51           | 0.182 | 0.035          |
| 8wks              | 63.09±41.19                  | 54.68±38.06                 | Time*Group | 0.23                                    | 1,77,<br>90.31 | 0.765 | 0.005          |
| HRV-TP            | ms <sup>2</sup>              |                             |            |                                         |                |       |                |
| Baseline          | 913.43±613.60                | 1071.63±876.97              | Time       | 0.69                                    | 2,102          | 0.502 | 0.013          |
| 4wks              | 985.86±1030.49               | 1041.21±1223.80             | Group      | 0.07                                    | 1,51           | 0.795 | 0.001          |
| 8wks              | 1185.43± 1570.90             | 1115.73±973.82              | Time*Group | 0.16                                    | 2,102          | 0.851 | 0.003          |
| HRV-LF/HF         |                              |                             |            |                                         |                |       |                |
| Baseline          | 1.52±1.30                    | 2.01±2.14                   | Time       | 0.47                                    | 2,102          | 0.629 | 0.009          |
| 4wks              | 1.64±1.41                    | 1.64±1.79                   | Group      | 0.00                                    | 1,51           | 0.958 | 0.000          |
| 8wks              | 2.19±2.43                    | 1.64±1.34                   | Time*Group | 1.65                                    | 2,102          | 0.197 | 0.031          |
| Outcome           | Means±SD                     | Means±SD                    | Effect     | F                                       | df             | p     | η <sup>2</sup> |

|                  |                   |              |            |        |                |       |       |
|------------------|-------------------|--------------|------------|--------|----------------|-------|-------|
| Variables        |                   |              |            |        |                |       |       |
| Phase Angle      | °                 |              |            |        |                |       |       |
| Baseline         | 5.89±0.85         | 5.83±0.85    | Time       | 15.74  | 1.75,<br>89.01 | 0.000 | 0.236 |
| 4wks             | 5.63±0.75         | 5.67±0.78    | Group      | 0.00   | 1,51           | 0.952 | 0.000 |
| 8wks             | 5.62±0.67         | 5.60±0.84    | Time*Group | 0.53   | 1.75,<br>89.01 | 0.566 | 0.010 |
| Reactance        | Ω                 |              |            |        |                |       |       |
| Baseline         | 58.20±6.77        | 57.34±8.65   | Time       | 73.61  | 2,102          | 0.000 | 0.591 |
| 4wks             | 64.90±6.64        | 65.18±9.29   | Group      | 0.26   | 1,51           | 0.610 | 0.005 |
| 8wks             | 65.83±6.82        | 63.40±7.79   | Time*Group | 2.05   | 2,102          | 0.135 | 0.039 |
| Impedance        | Ω                 |              |            |        |                |       |       |
| Baseline         | 573.65±72.01      | 570.64±83.13 | Time       | 364.15 | 2,102          | 0.000 | 0.877 |
| 4wks             | 669.27±85.20      | 666.11±97.96 | Group      | 0.14   | 1,51           | 0.714 | 0.003 |
| 8wks             | 676.51±81.64      | 657.39±88.55 | Time*Group | 2.59   | 2,102          | 0.080 | 0.048 |
| BMI              | kg/m <sup>2</sup> |              |            |        |                |       |       |
| Baseline         | 22.23±3.11        | 23.03±3.12   | Time       | 1.85   | 2,102          | 0.163 | 0.035 |
| 4wks             | 22.23±3.16        | 22.72±3.02   | Group      | 0.60   | 1,51           | 0.443 | 0.012 |
| 8wks             | 22.20±3.12        | 22.88±2.90   | Time*Group | 1.70   | 2,102          | 0.189 | 0.032 |
| Fat -Total       | kg                |              |            |        |                |       |       |
| Baseline         | 16.21±4.88        | 17.30±5.03   | Time       | 10.12  | 1.80,<br>91.60 | 0.000 | 0.166 |
| 4wks             | 16.18±5.00        | 16.55±4.90   | Group      | 0.18   | 1,51           | 0.678 | 0.003 |
| 8wks             | 15.86±4.86        | 16.10±5.31   | Time*Group | 3.43   | 1.80,<br>91.60 | 0.041 | 0.063 |
| Fat-Visceral     | kg                |              |            |        |                |       |       |
| Baseline         | 1.86±0.96         | 2.00±0.95    | Time       | 9.96   | 2,102          | 0.000 | 0.163 |
| 4wks             | 1.87±1.00         | 1.87±0.82    | Group      | 0.04   | 1,51           | 0.846 | 0.001 |
| 8wks             | 1.79±0.94         | 1.80±0.93    | Time*Group | 3.76   | 2,102          | 0.027 | 0.069 |
| Fat-Subcutaneous | kg                |              |            |        |                |       |       |
| Baseline         | 14.36±3.96        | 15.30±4.12   | Time       | 9.81   | 1.78,<br>90.50 | 0.000 | 0.161 |
| 4wks             | 14.30±4.04        | 14.69±4.11   | Group      | 0.22   | 1,51           | 0.644 | 0.004 |
| 8wks             | 14.07±3.96        | 14.30±4.41   | Time*Group | 3.29   | 1.78,<br>90.50 | 0.047 | 0.061 |

Note: \*Interaction between Time and the Group. Abbreviations: CAVI, Cardio-Ankle Vascular Index; HRV, Heart Rate Variability; PSI, Physical Stress Index; SDNN, Standard Deviation of Normal to Normal Intervals; RMSSD, Root Mean Square of the Successive Differences; PSI, Physical Stress Index; TP, Total Power; LF, Low Frequency; HF, High Frequency; BMI, Body Mass Index.



Table S5: Effects of Treatment on the Secondary Outcome Variables: BEPSI-K, BFI, FSS, and SF-36

| Outcome Variables      | ERW Group<br>(n=29)<br>Mean±SD | MW Group<br>(n=24)<br>Mean±SD | Main Effects of<br>Repeated Measures ANOVA |      |                |       |                |
|------------------------|--------------------------------|-------------------------------|--------------------------------------------|------|----------------|-------|----------------|
|                        |                                |                               | Effects                                    | F    | df             | p     | η <sup>2</sup> |
| BEPSI-K                |                                |                               |                                            |      |                |       |                |
| Baseline               | 1.82± 0.65                     | 1.73±0.51                     | Time                                       | 0.60 | 2,102          | 0.553 | 0.012          |
| 4wks                   | 1.71± 0.72                     | 1.73±0.51                     | Group                                      | 0.01 | 1,51           | 0.907 | 0.000          |
| 8wks                   | 1.76± 0.73                     | 1.78±0.56                     | Time*Group                                 | 0.68 | 2,102          | 0.511 | 0.013          |
| BFI                    |                                |                               |                                            |      |                |       |                |
| BFI Global             |                                |                               |                                            |      |                |       |                |
| Baseline               | 4.14±2.09                      | 4.01±2.27                     | Time                                       | 4.28 | 2,102          | 0.016 | 0.077          |
| 4wks                   | 3.60±1.98                      | 3.56±2.09                     | Group                                      | 0.00 | 1,51           | 0.964 | 0.000          |
| 8wks                   | 3.28±2.29                      | 3.38±2.28                     | Time*Group                                 | 0.11 | 2,102          | 0.901 | 0.002          |
| BFI Severity           |                                |                               |                                            |      |                |       |                |
| Baseline               | 5.69± 2.06                     | 5.36±2.45                     | Time                                       | 3.11 | 2,102          | 0.049 | 0.057          |
| 4wks                   | 5.49± 1.77                     | 5.14±2.28                     | Group                                      | 0.33 | 1,51           | 0.566 | 0.007          |
| 8wks                   | 4.90± 2.32                     | 4.71±2.40                     | Time*Group                                 | 0.05 | 2,102          | 0.956 | 0.001          |
| BFI Interference       |                                |                               |                                            |      |                |       |                |
| Baseline               | 3.36± 2.39                     | 3.33±2.38                     | Time                                       | 3.72 | 2,102          | 0.028 | 0.068          |
| 4wks                   | 2.66± 2.37                     | 2.76±2.30                     | Group                                      | 0.04 | 1,51           | 0.845 | 0.001          |
| 8wks                   | 2.47± 2.46                     | 2.72±2.41                     | Time*Group                                 | 0.11 | 2,102          | 0.895 | 0.002          |
| FSS                    |                                |                               |                                            |      |                |       |                |
| Baseline               | 3.58± 1.58                     | 3.65±1.68                     | Time                                       | 1.83 | 1,74,<br>88.48 | 0.172 | 0.035          |
| 4wks                   | 3.15± 1.53                     | 3.40±1.67                     | Group                                      | 0.01 | 1,51           | 0.928 | 0.000          |
| 8wks                   | 3.39± 1.81                     | 3.17±1.65                     | Time*Group                                 | 0.68 | 1,74,<br>88.48 | 0.489 | 0.013          |
| SF-36 Health Survey    |                                |                               |                                            |      |                |       |                |
| Physical function (PF) |                                |                               |                                            |      |                |       |                |
| Baseline               | 84.14±21.34                    | 84.79±16.12                   | Time                                       | 0.24 | 2,102          | 0.785 | 0.005          |
| 4wks                   | 84.83±14.42                    | 80.83±21.30                   | Group                                      | 0.02 | 1,51           | 0.884 | 0.000          |
| 8wks                   | 83.79±20.07                    | 85.42±16.08                   | Time*Group                                 | 0.56 | 2,102          | 0.572 | 0.011          |
| Role-Physical (RP)     |                                |                               |                                            |      |                |       |                |
| Baseline               | 70.69±35.40                    | 71.88±28.85                   | Time                                       | 0.58 | 2,102          | 0.562 | 0.011          |
| 4wks                   | 67.24±36.66                    | 79.17±25.18                   | Group                                      | 0.75 | 1,51           | 0.389 | 0.015          |
| 8wks                   | 71.55±35.81                    | 79.17±31.85                   | Time*Group                                 | 1.02 | 2,102          | 0.365 | 0.020          |
| Bodily Pain (BP)       |                                |                               |                                            |      |                |       |                |
| Baseline               | 70.78±23.49                    | 76.88±16.83                   | Time                                       | 0.66 | 2,102          | 0.518 | 0.013          |
| 4wks                   | 75.60±24.88                    | 77.60±22.49                   | Group                                      | 0.11 | 1,51           | 0.747 | 0.002          |

|                         |              |              |            |      |       |       |       |
|-------------------------|--------------|--------------|------------|------|-------|-------|-------|
| 8wks                    | 78.71±22.50  | 75.42±19.46  | Time*Group | 1.20 | 2,102 | 0.307 | 0.023 |
| General Health (GH)     |              |              |            |      |       |       |       |
| Baseline                | 53.97±18.00  | 58.75±19.69  | Time       | 0.04 | 2,102 | 0.963 | 0.001 |
| 4wks                    | 57.24±15.96  | 55.63±22.52  | Group      | 0.08 | 1,51  | 0.780 | 0.002 |
| 8wks                    | 56.35±18.02  | 57.29±21.47  | Time*Group | 1.62 | 2,102 | 0.203 | 0.031 |
| Vitality (VT)           |              |              |            |      |       |       |       |
| Baseline                | 50.17±14.67  | 56.25±15.90  | Time       | 1.00 | 2,102 | 0.371 | 0.019 |
| 4wks                    | 51.21±15.85  | 53.13±16.14  | Group      | 1.17 | 1,51  | 0.285 | 0.022 |
| 8wks                    | 52.76±18.20  | 57.50±19.73  | Time*Group | 0.50 | 2,102 | 0.608 | 0.010 |
| Social Functioning (SF) |              |              |            |      |       |       |       |
| Baseline                | 74.57±20.45  | 82.81±16.41  | Time       | 0.92 | 2,102 | 0.401 | 0.018 |
| 4wks                    | 76.30±19.29  | 79.69±20.46  | Group      | 1.18 | 1,51  | 0.283 | 0.023 |
| 8wks                    | 79.97±22.61  | 82.71±14.82  | Time*Group | 0.67 | 2,102 | 0.514 | 0.013 |
| Role-Emotional (RE)     |              |              |            |      |       |       |       |
| Baseline                | 65.52±44.08  | 79.17±33.79  | Time       | 0.25 | 2,102 | 0.778 | 0.005 |
| 4wks                    | 66.67±39.85  | 80.56±35.33  | Group      | 1.37 | 1,51  | 0.248 | 0.026 |
| 8wks                    | 72.41±36.81  | 77.79±33.57  | Time*Group | 0.78 | 2,102 | 0.463 | 0.015 |
| Mental Health (MH)      |              |              |            |      |       |       |       |
| Baseline                | 63.72±16.07  | 67.00±13.36  | Time       | 0.94 | 2,102 | 0.395 | 0.018 |
| 4wks                    | 64.41±16.01  | 62.50±16.38  | Group      | 0.24 | 1,51  | 0.628 | 0.005 |
| 8wks                    | 63.90± 19.95 | 68.33± 16.72 | Time*Group | 1.43 | 2,102 | 0.245 | 0.027 |

Note: \*Interaction between Time and the Group. Abbreviations: BEPSI-K, Brief Encounter Psychosocial Instrument - Korean version; BFI, Brief Fatigue Inventory; FSS, Fatigue Severity Scale; SF-36, 36-Item Short Form Survey.
